# Supplementary material for: Myristica lowiana Phytochemicals as Inhibitor of Plasmid Conjugation in Escherichia coli
Source: Hindawi journal article supplement (doi:10.1155/2020/1604638), 2020-01-01
Supplement: f1 [file 1604638.f1.pdf]

## Supplementary Material

### *Myristica lowiana* phytochemicals as inhibitor of plasmid conjugation in *Escherichia coli*

Awo Afi Kwapong, Sarah Soares, Stephen Ping Teo, Paul Stapleton, Simon Gibbons

#### Additional Experimental Detail

##### 1. Biological activities

**Table 1:** The conjugation pair, their average population size used and their average conjugation frequency in the liquid conjugation procedure

| Conjugation pair                                        |                                                          | Average conjugation frequency $\pm$ SD (cfu/mL) |
|---------------------------------------------------------|----------------------------------------------------------|-------------------------------------------------|
| Average donor size $\pm$ SD (cfu/mL)                    | Average recipient size $\pm$ SD (cfu/mL)                 |                                                 |
| pKM101 ( $2.19 \times 10^9 \pm 7.79 \times 10^8$ )      | ER1793 ( $3.77 \times 10^{10} \pm 3.52 \times 10^{10}$ ) | $2.10 \times 10^{-3} \pm 2.17 \times 10^{-3}$   |
| TP114 ( $2.77 \times 10^{10} \pm 2.62 \times 10^{10}$ ) | ER1793 ( $7.73 \times 10^9 \pm 4.01 \times 10^9$ )       | $6.68 \times 10^{-3} \pm 2.78 \times 10^{-3}$   |
| pUB307 ( $3.16 \times 10^9 \pm 2.75 \times 10^9$ )      | ER1793 ( $4.13 \times 10^9 \pm 2.98 \times 10^9$ )       | $1.45 \times 10^{-1} \pm 7.01 \times 10^{-2}$   |
| R7K ( $9.17 \times 10^{10} \pm 5.51 \times 10^{10}$ )   | JM109 ( $8.70 \times 10^{10} \pm 7.46 \times 10^{10}$ )  | $1.08 \times 10^{-4} \pm 8.65 \times 10^{-5}$   |

**Table 2:** The cytotoxic effect of *M. lowiana* hexane extract and methanol fraction on adult human dermal fibroblast cells (HDFa, C-013-5C)

| Concentration (mg/L) | Average cells viability compared to control $\pm$ SD (%) |                   |
|----------------------|----------------------------------------------------------|-------------------|
|                      | Hexane extract                                           | Methanol fraction |
| 12.5                 | $111.94 \pm 6.87$                                        | $84.72 \pm 2.80$  |
| 25.0                 | $104.99 \pm 3.83$                                        | $90.31 \pm 3.43$  |
| 50.0                 | $107.62 \pm 5.94$                                        | $99.35 \pm 3.59$  |
| 100.0                | $104.91 \pm 6.83$                                        | $51.56 \pm 5.73$  |
| 200.0                | $101.62 \pm 7.74$                                        | $26.56 \pm 2.21$  |
| 400.0                | $88.52 \pm 3.51$                                         | $23.28 \pm 1.71$  |

##### 2. Spectroscopic data for the *M. lowiana* hexane extract and methanol fraction

**a. NMR, HRESIMS and IR spectra for the *M. lowiana* hexane extract**

Sample Ref MIHEX1

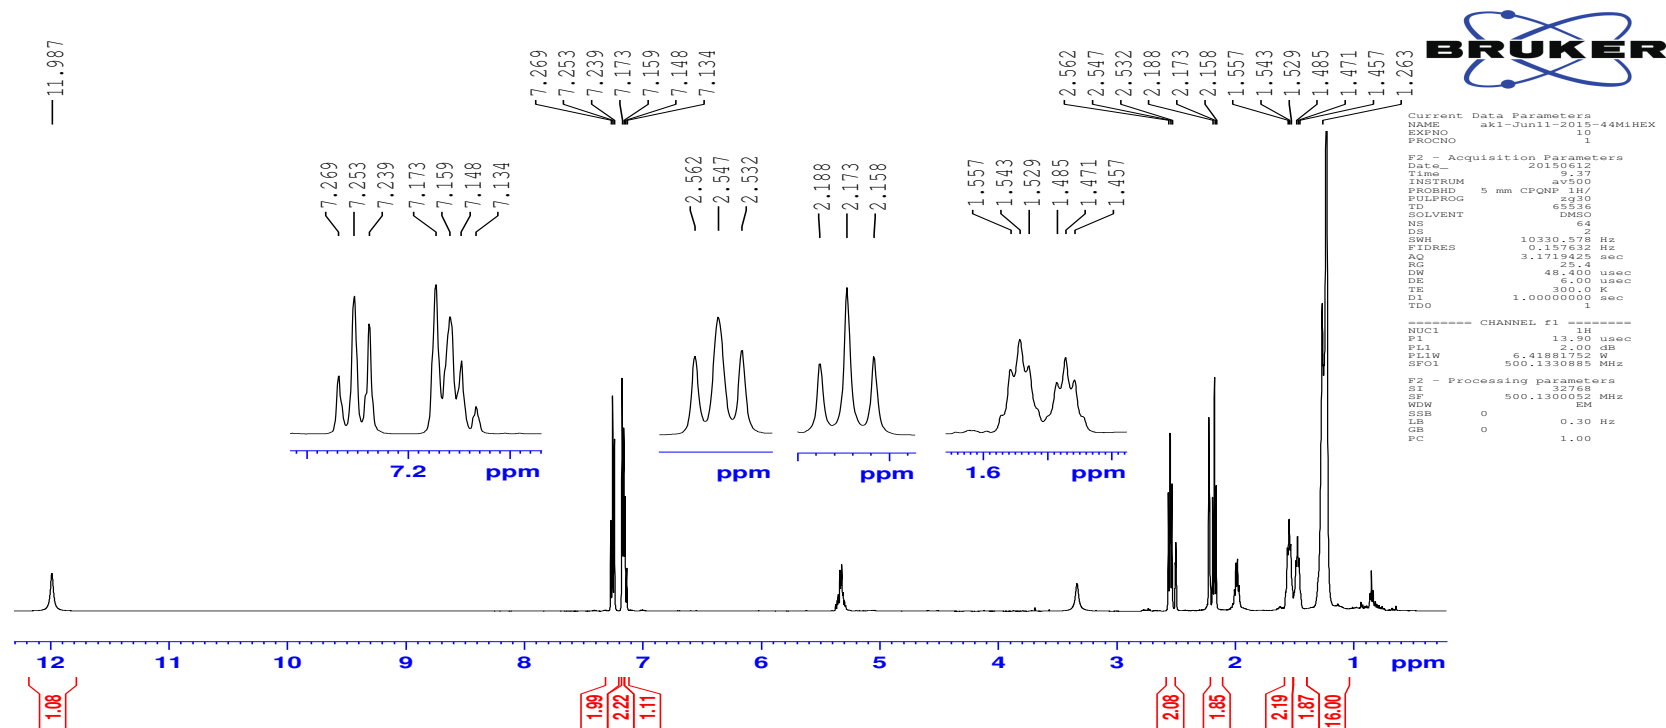

Figure 1:  $^1\text{H}$  NMR spectrum for the *M. lowiana* hexane extract, recorded in DMSO, 500 MHz

Sample Ref MIHEX1

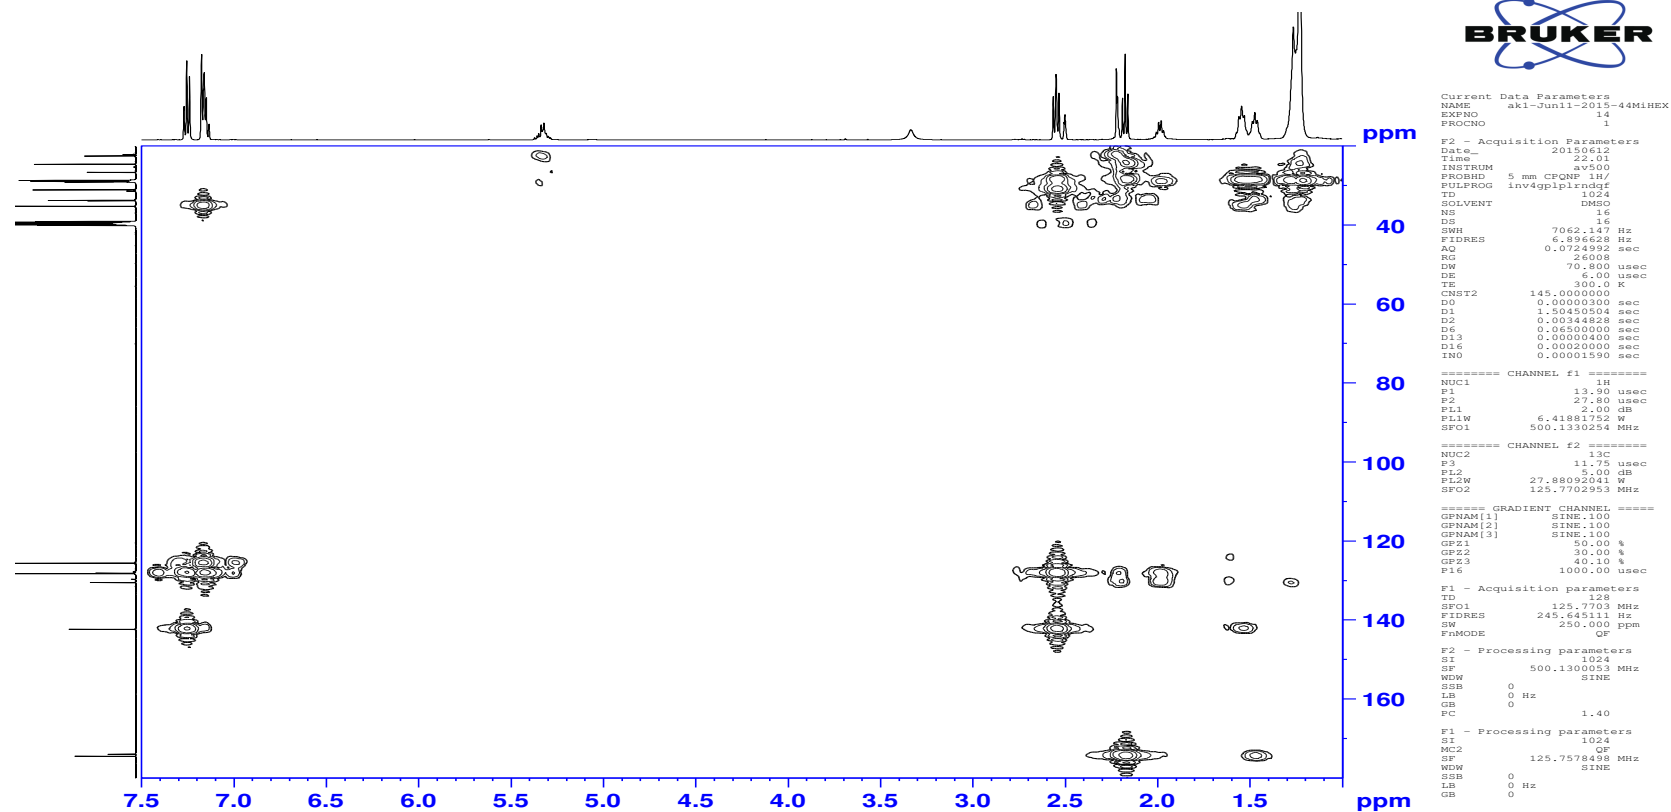

Figure 2: HMBC NMR for the *M. lowiana* hexane extract

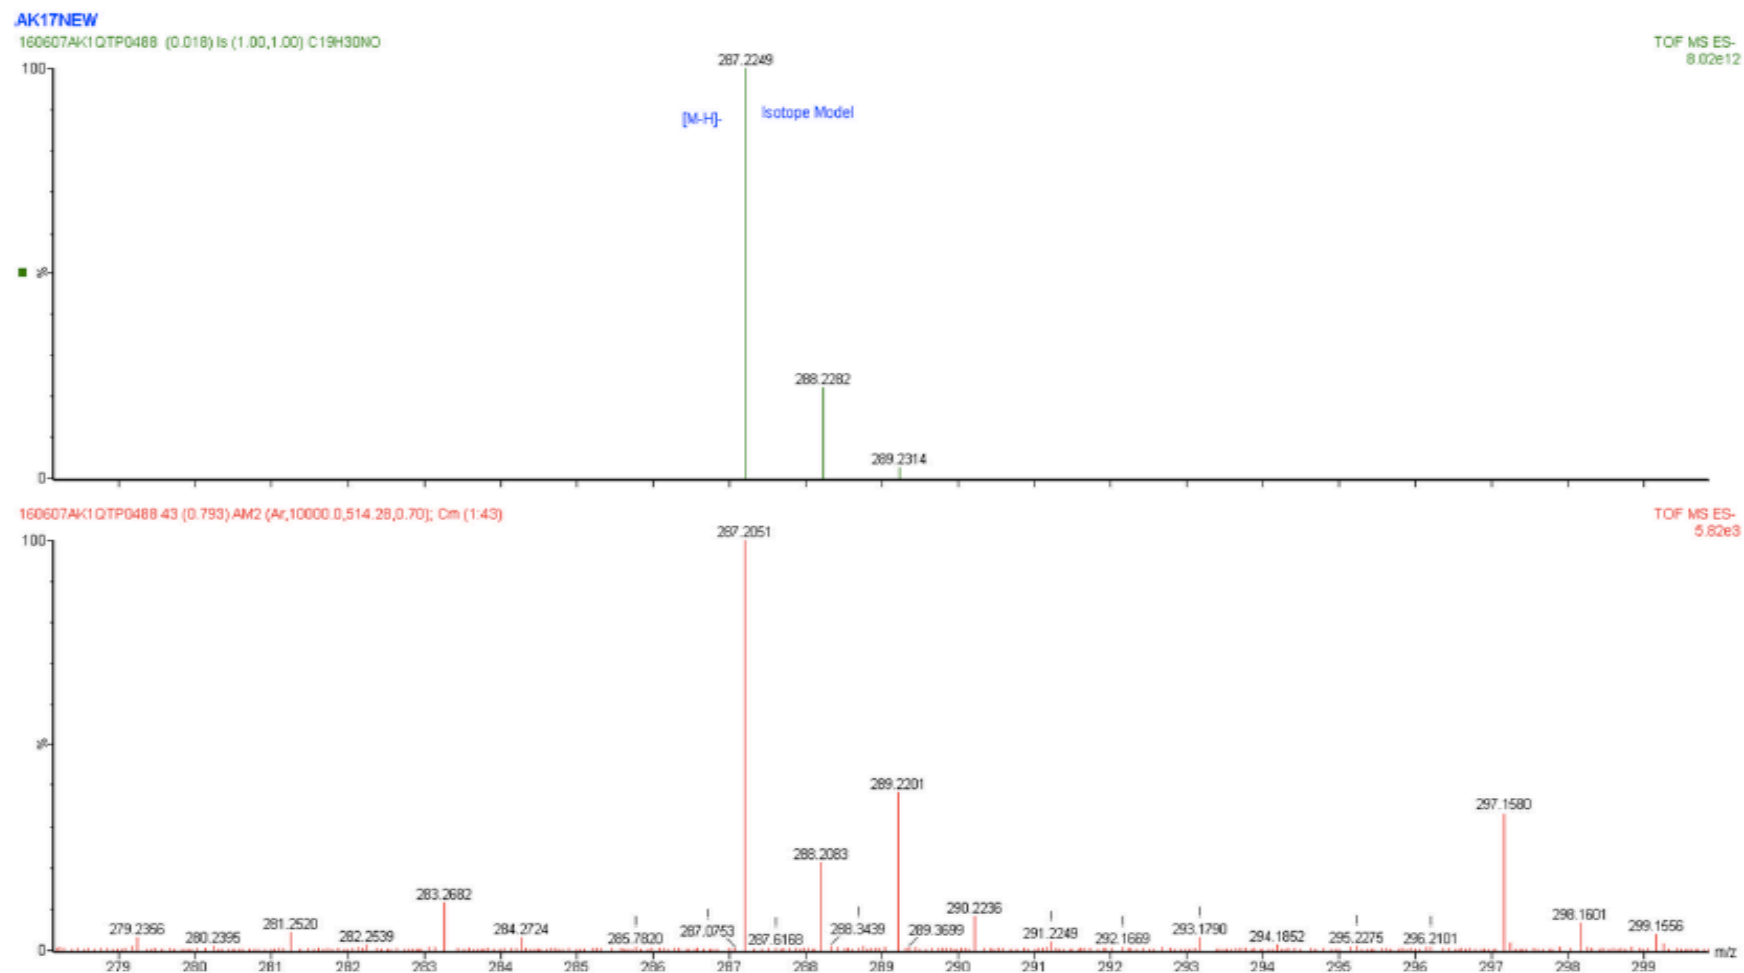

Figure 3: HRESIMS spectrum for the *M. lowiana* hexane extract

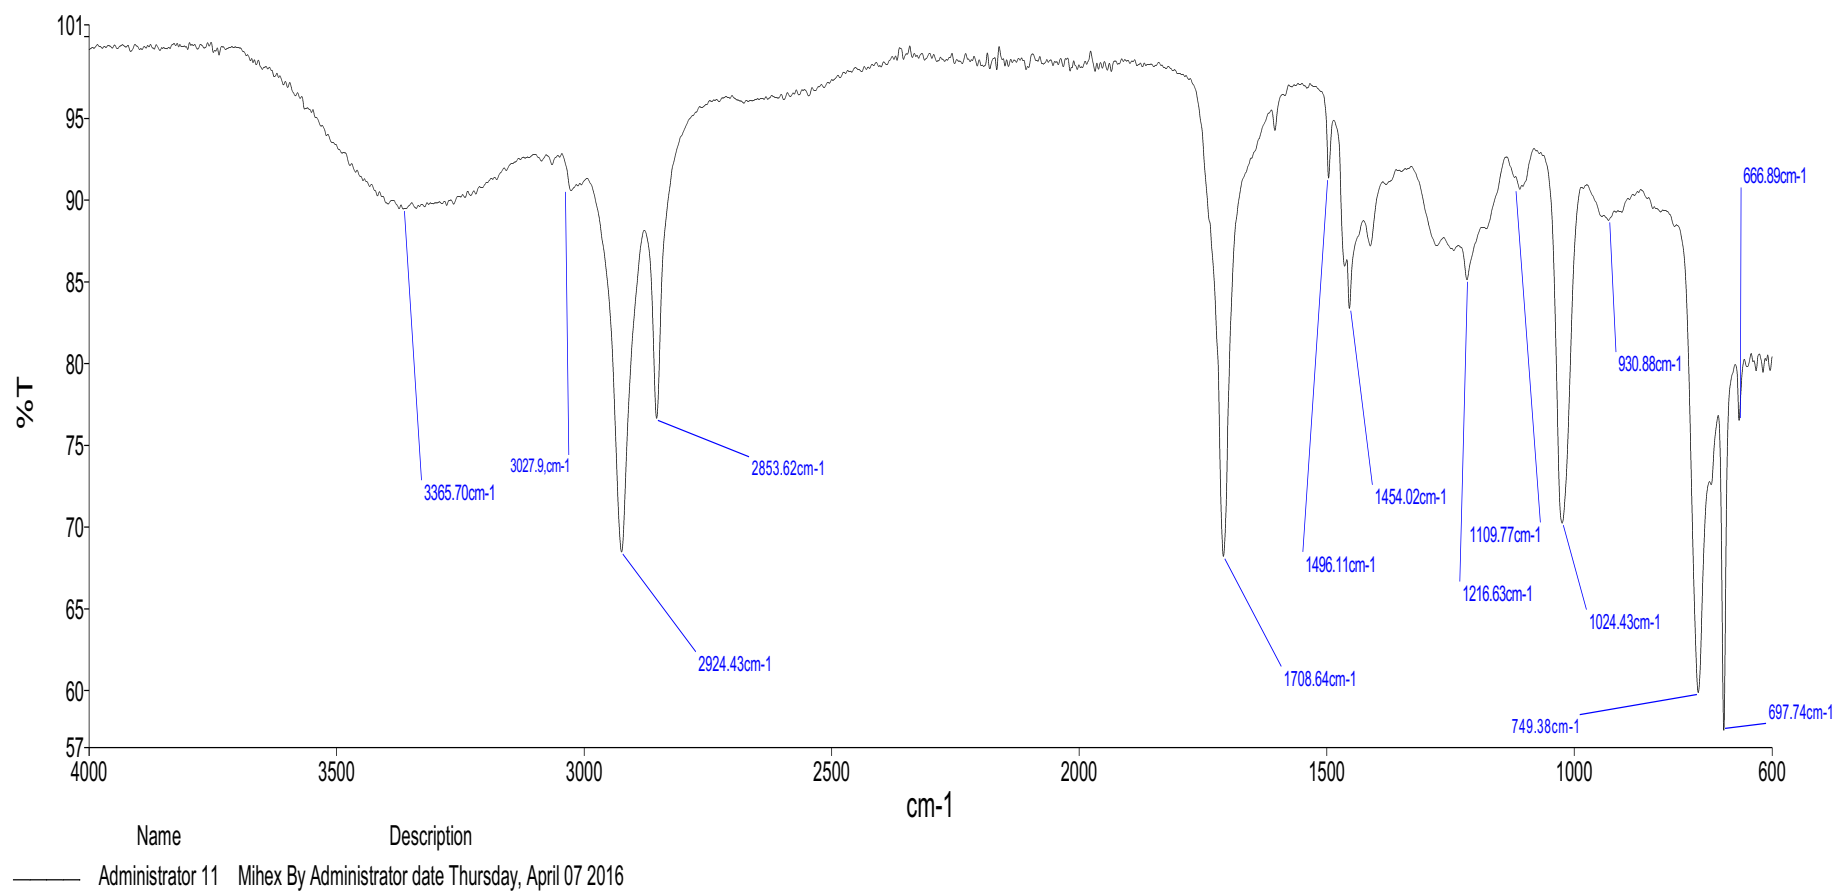

**Figure 4:** IR spectrum for the *M. lowiana* hexane extract

b. NMR, HRESIMS and IR spectra for the *M. lowiana* methanol fraction

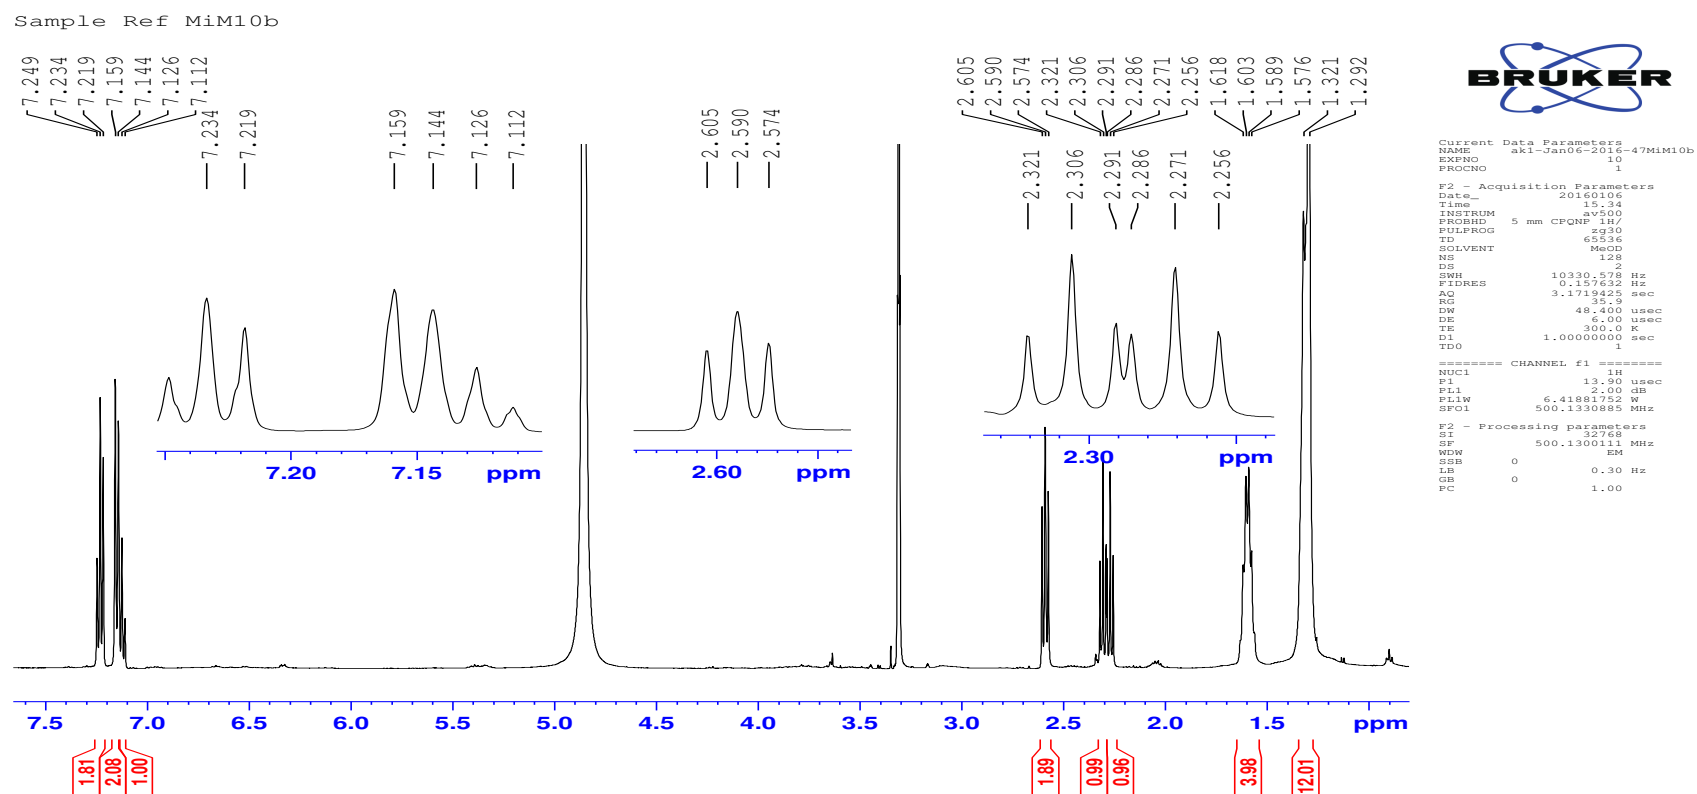

Figure 5:  $^1\text{H}$  NMR spectrum for the *M. lowiana* methanol fraction, recorded in methanol, 500 MHz

Sample Ref MiM10b

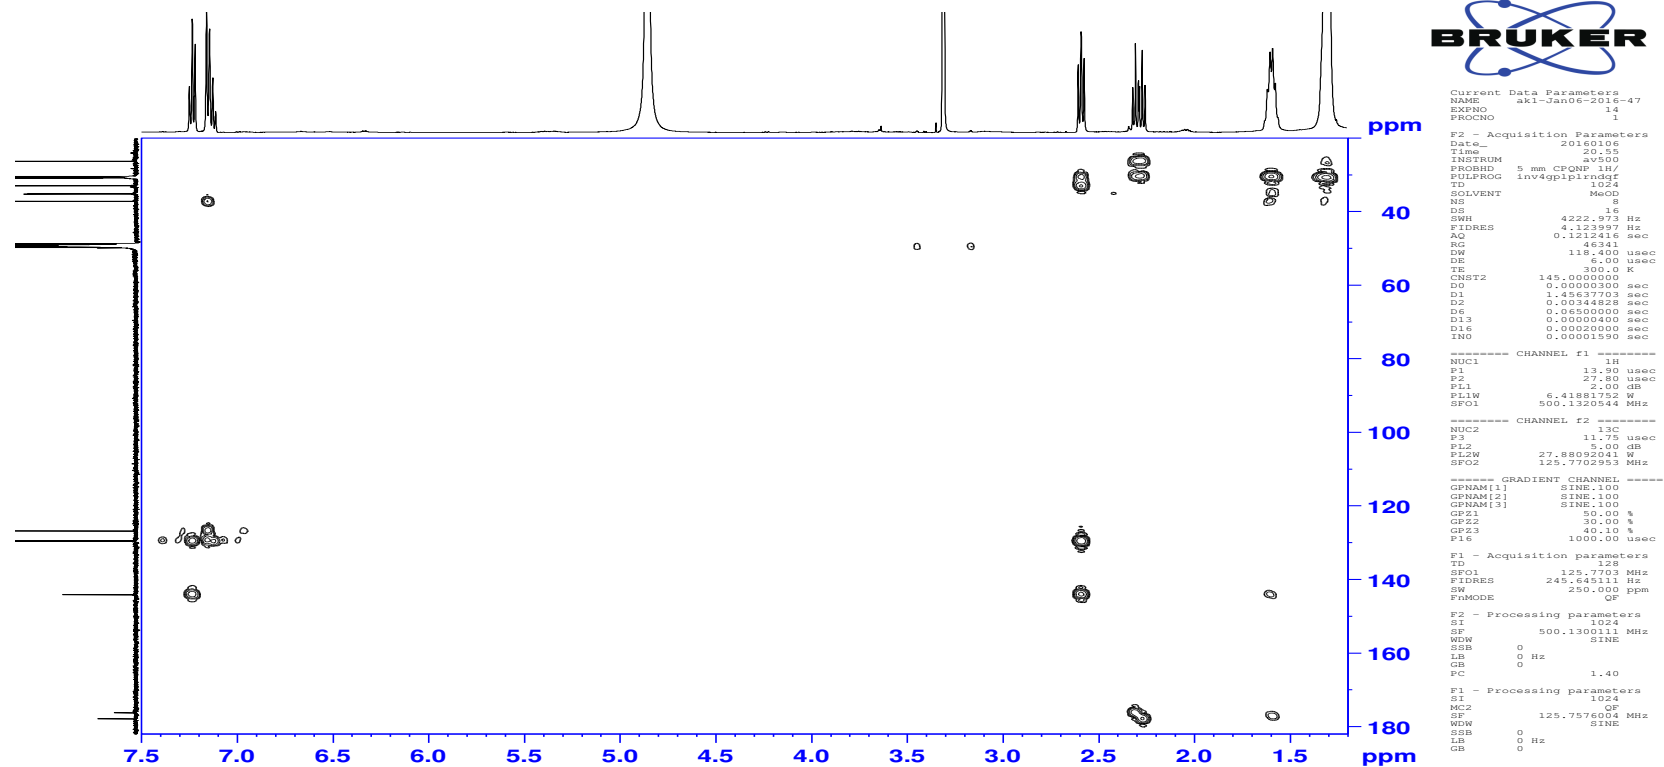

Figure 6: HMBC NMR spectrum for the *M. lowiana* methanol fraction



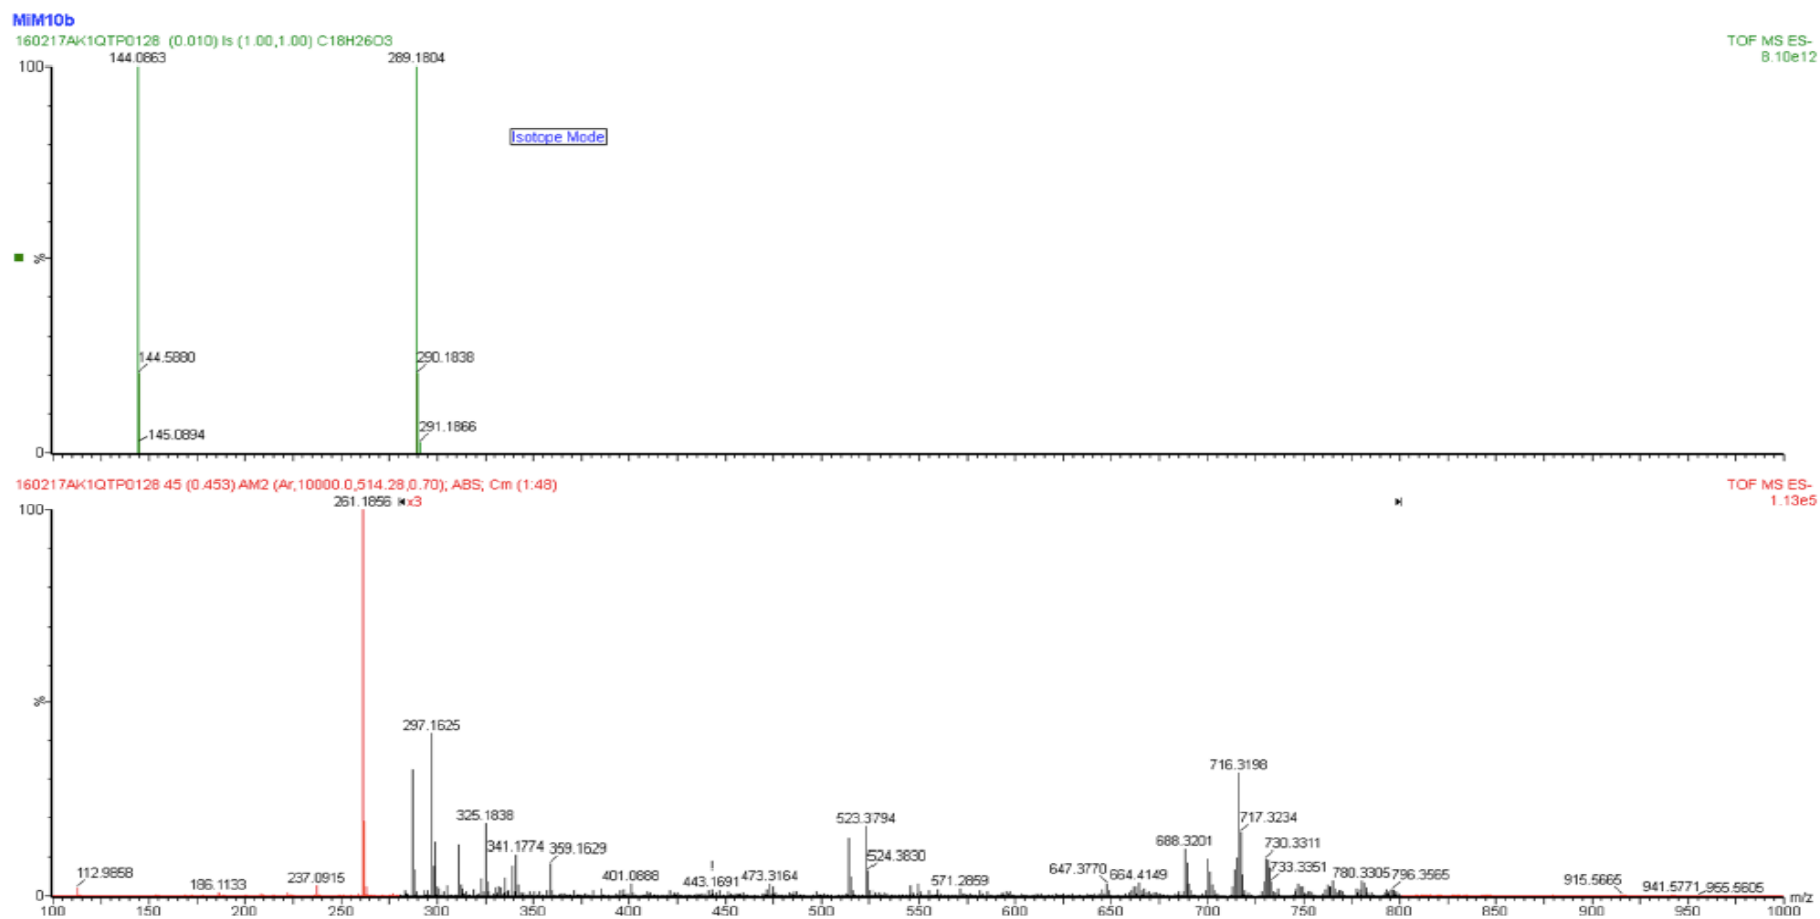

Figure 7: HRESIMS spectrum for the *M. lowiana* methanol fraction

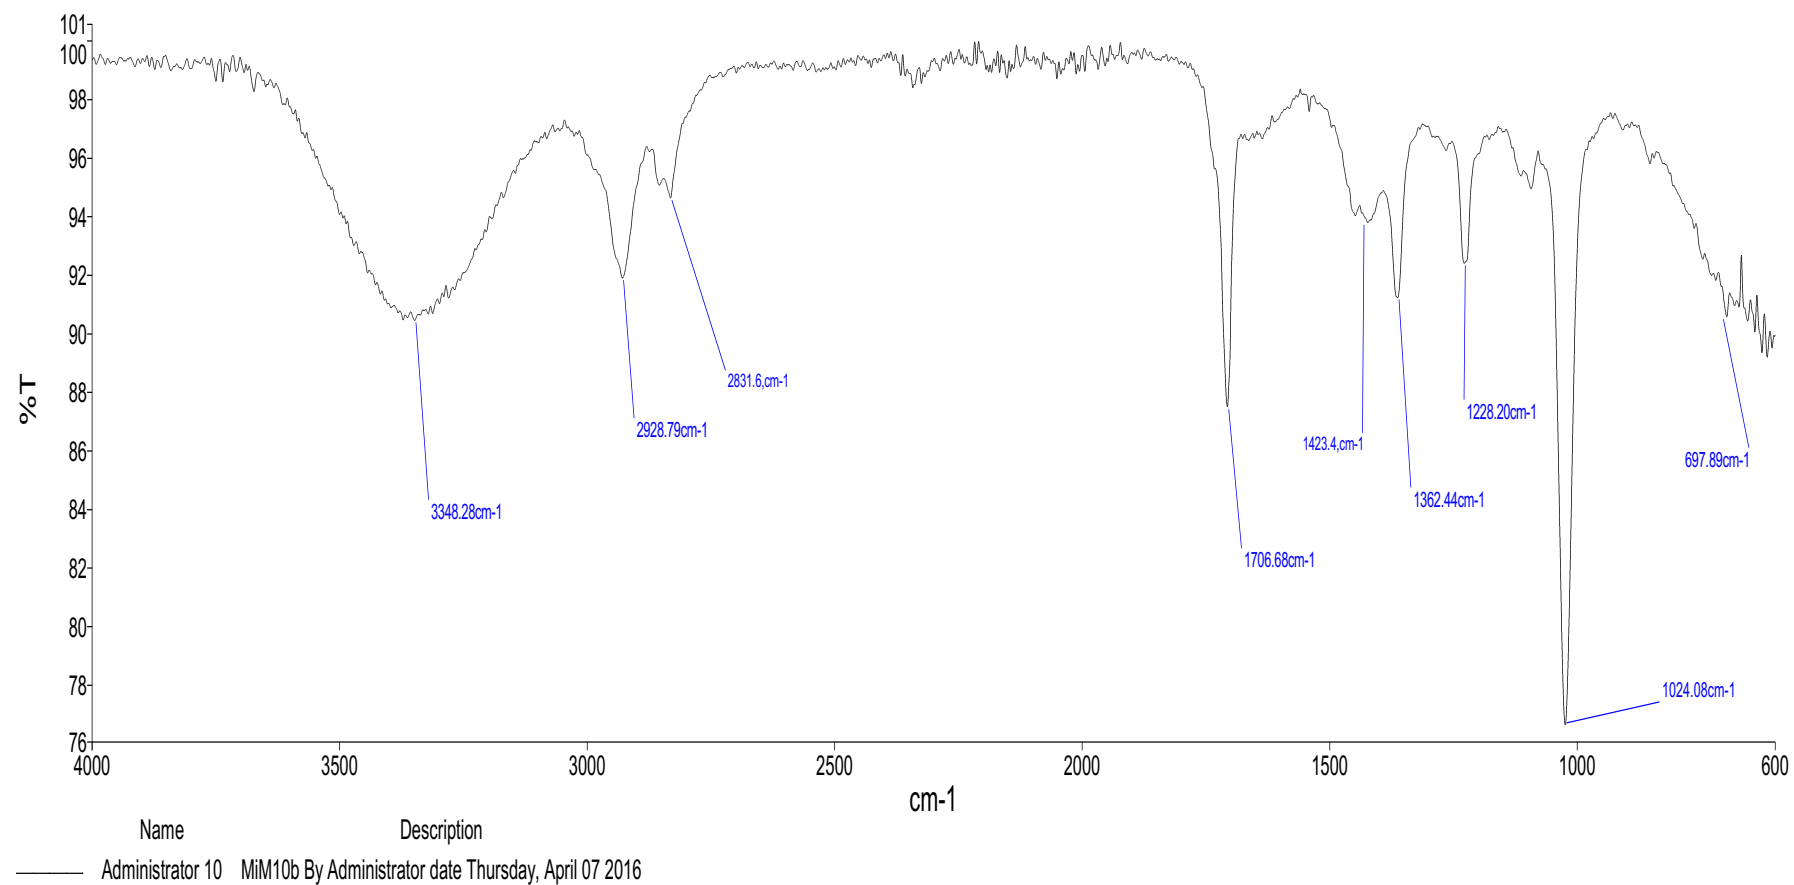

**Figure 8: IR spectrum for the *M. lowiana* methanol fraction**
